# Supplementary material for: Interactions among Relevant Non-Saccharomyces, Saccharomyces, and Lactic Acid Bacteria Species of the Wine Microbial Consortium: Towards Advances in Antagonistic Phenomena and Biocontrol Potential
Source: MDPI journal article supplement (doi:10.3390/app122412760), 2022-12-12
Supplement: s1 [file s1]

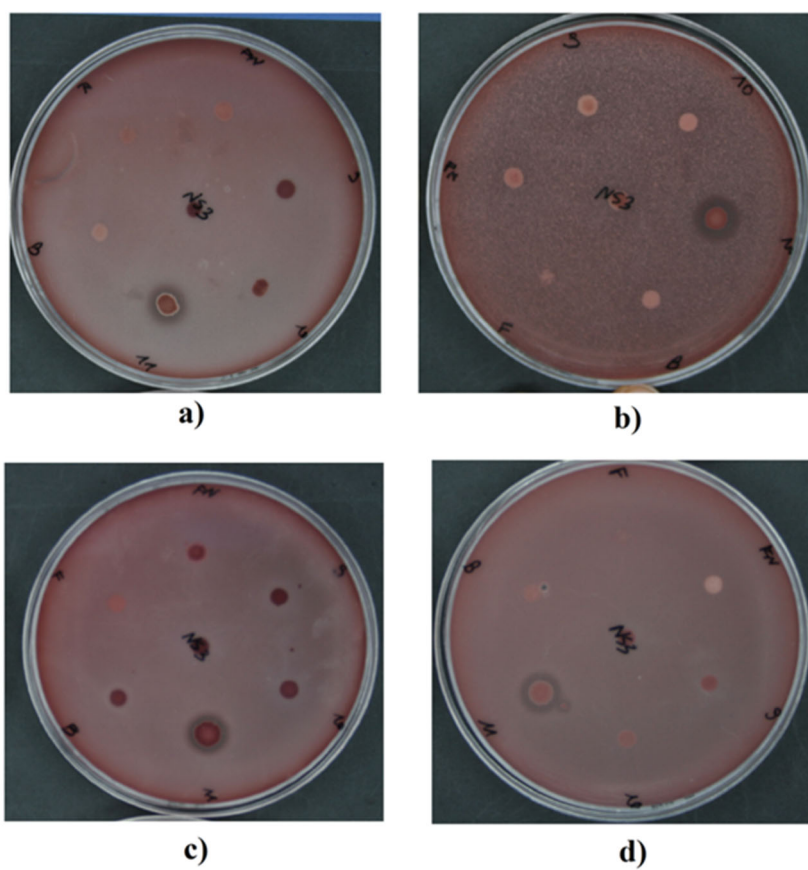

**Figure S1.** Inhibitions of *P. fermentans* B05A29 (spot 11 on the plates) toward a) *T. delbrueckii* CECT 11199, b) *T. delbrueckii* 291, c) *B. bruxellensis* 2 and d) *B. bruxellensis* 6 on agarised grape juice.
